# Supplementary material for: Overcoming challenges in human saliva gene expression measurements
Source: PubMed Central journal article supplement (PMC7341869; doi:10.1038/s41598-020-67825-6), 2020-07-07
Supplement: 41598_2020_67825_MOESM1_ESM.pdf [file 41598_2020_67825_MOESM1_ESM.pdf]

# Overcoming challenges in human saliva gene expression measurements

Ostheim P<sup>1,\*</sup>, Tichý A<sup>2</sup>, Sirak I<sup>3</sup>, Davidkova M<sup>4</sup>, Markova Stastna M<sup>5</sup>, Kultova G<sup>2</sup>, Paunesku T<sup>6</sup>,  
Woloschak G<sup>6</sup>, Majewski M<sup>1,7</sup>, Port M<sup>1</sup>, Abend M<sup>1</sup>

<sup>1</sup> Bundeswehr Institute of Radiobiology, Munich Germany

<sup>2</sup> Department of Radiobiology, Faculty of Military Health Sciences in Hradec Kralove,  
University of Defence in Brno, Czech Republic

<sup>3</sup> Department of Oncology and Radiotherapy University Hospital and Faculty of Medicine,  
Hradec Kralove, Czech Republic

<sup>4</sup> Department of Radiation Dosimetry, Nuclear Physics Institute of the Czech Academy of  
Sciences, Prague, Czech Republic

<sup>5</sup> Institute for Hematology and Blood Transfusion, Hospital Na Bulovce, Prague, Czech Republic

<sup>6</sup> Department of Radiation Oncology, Northwestern University, Chicago, Illinois 60611, United  
States

<sup>7</sup> Department of Urology, Bundeswehrkrankenhaus Ulm, Germany

Second Revised version

submitted to

**Scientific Reports**

2<sup>nd</sup> June 2020

Number of figures: 4 (+2 supplement)

Number of tables: 3 (+1 supplement)

\* Corresponding Author: Patrick Ostheim,  
Bundeswehr Institute of Radiobiology affiliated to the University of Ulm,  
Neuherbergstr. 11, 80937 Munich, Germany, phone/fax: +49-89-992692-2283/-2250,  
e-mail: [patrickostheim@bundeswehr.org](mailto:patrickostheim@bundeswehr.org)

This work was supported by the German Ministry of Defence

## Supplemental figure 1

Ostheim et al.

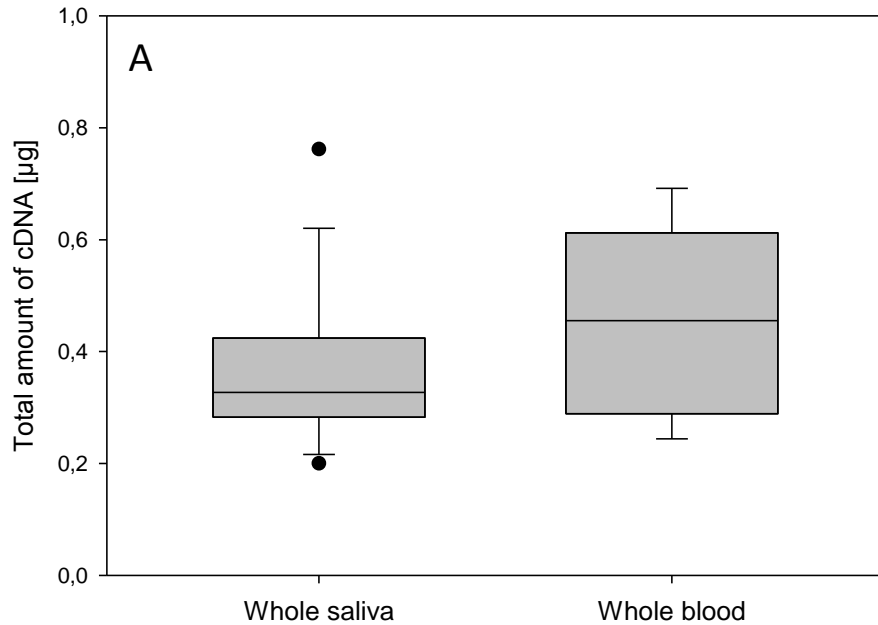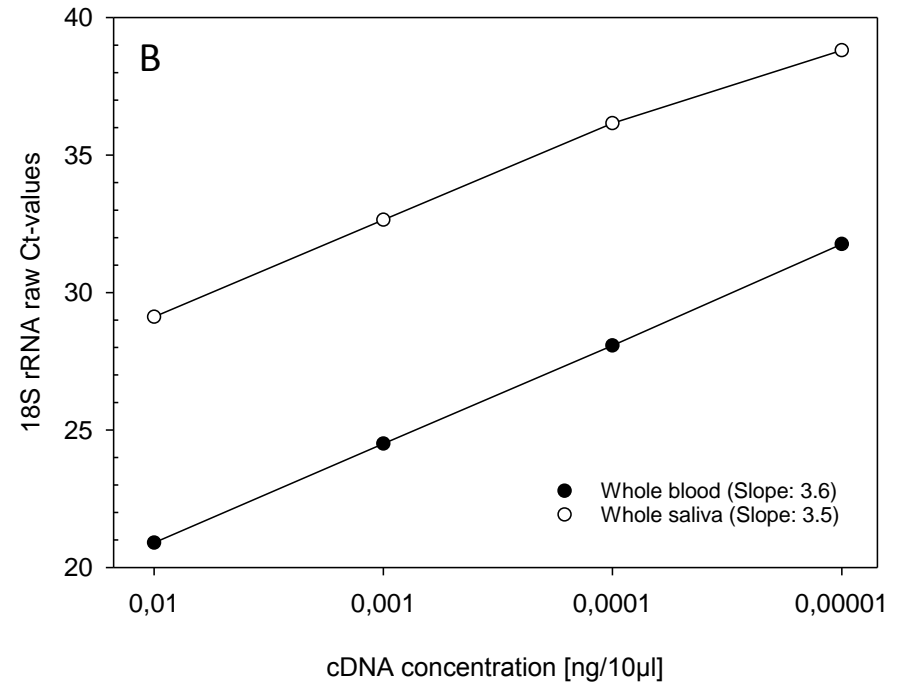

### Supplemental figure 1

Box plots in (A) illustrate the total cDNA amounts ( $\mu\text{g}$ ) measured fluorometrically (via Qubit 2.0 Fluorometer) from whole saliva ( $n=12$ ) and whole blood ( $n=6$ ). Input of 1  $\mu\text{g}$  of total RNA was synthesized during cDNA synthesis previously.

Scatter plots in (B) display the results from cDNA dilution series and measurement of 18S rRNA raw Ct-values from whole saliva and whole blood samples using four different cDNA serial concentrations from 0.01 to 0.00001  $\text{ng}/10\mu\text{l}$ . Slopes were calculated from the first-order linear regression analysis.

## Supplemental figure 2

Ostheim et al.

A

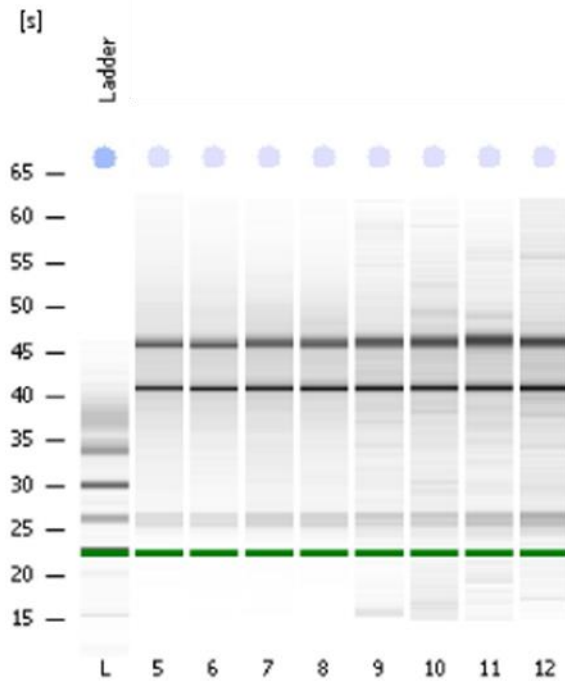

B

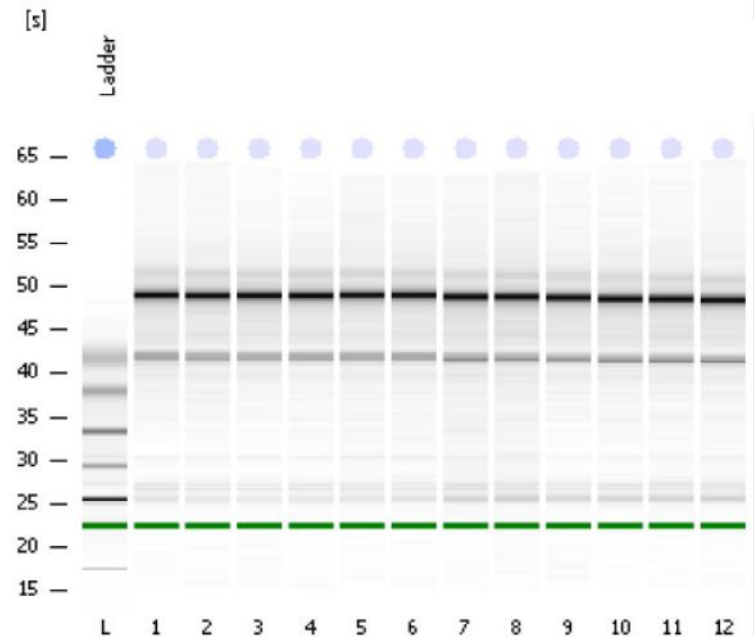

### Supplemental figure 2

These Gel-like images created by the Agilent bioanalyzer show the quality of isolated RNA and display bands of rRNA for eight randomly selected saliva samples as well as for six whole blood samples (duplicate measurements). They additionally depict the original versions of the cropped images of figure 1.

**Supplemental table 1**

Ostheim et al.

| Gene            | Sample ID       | Pre-amplification | Measurements   |                                        |                               | Interpretation              |            |     |
|-----------------|-----------------|-------------------|----------------|----------------------------------------|-------------------------------|-----------------------------|------------|-----|
|                 |                 |                   | Mean Ct values | <i>Difference observed vs expected</i> | Manufacturer predicts success | <u>Our findings:</u> works? | Agreement? |     |
| <i>observed</i> | <i>expected</i> |                   |                |                                        |                               |                             |            |     |
| <b>CDKN1A</b>   | <b>1</b>        | <i>0x</i>         | <b>31.3</b>    |                                        |                               |                             |            |     |
|                 |                 | <i>10x</i>        | <b>21.3</b>    | 21.3                                   | -0.02                         | yes                         | yes        | yes |
|                 |                 | <i>14x</i>        | <b>17.5</b>    | 17.3                                   | 0.20                          | yes                         | yes        | yes |
|                 | <b>2</b>        | <i>0x</i>         | <b>30.6</b>    |                                        |                               |                             |            |     |
|                 |                 | <i>10x</i>        | <b>20.6</b>    | 20.6                                   | -0.04                         | yes                         | yes        | yes |
|                 |                 | <i>14x</i>        | <b>16.9</b>    | 16.6                                   | 0.26                          | yes                         | yes        | yes |
|                 | <b>3</b>        | <i>0x</i>         | <b>33.0</b>    |                                        |                               |                             |            |     |
|                 |                 | <i>10x</i>        | <b>22.9</b>    | 23.0                                   | -0.13                         | yes                         | yes        | yes |
|                 |                 | <i>14x</i>        | <b>19.0</b>    | 19.0                                   | 0.01                          | yes                         | yes        | yes |
|                 | <b>4</b>        | <i>0x</i>         | <b>31.5</b>    |                                        |                               |                             |            |     |
|                 |                 | <i>10x</i>        | <b>21.5</b>    | 21.5                                   | -0.02                         | yes                         | yes        | yes |
|                 |                 | <i>14x</i>        | <b>17.8</b>    | 17.5                                   | 0.31                          | yes                         | yes        | yes |
| <b>5</b>        | <i>0x</i>       | <b>33.9</b>       |                |                                        |                               |                             |            |     |
|                 | <i>10x</i>      | <b>24.5</b>       | 23.9           | 0.54                                   | yes                           | yes                         | yes        |     |
|                 | <i>14x</i>      | <b>20.5</b>       | 19.9           | 0.59                                   | yes                           | yes                         | yes        |     |
| <b>6</b>        | <i>0x</i>       | <b>32.6</b>       |                |                                        |                               |                             |            |     |
|                 | <i>10x</i>      | <b>22.6</b>       | 22.6           | 0.03                                   | yes                           | yes                         | yes        |     |
|                 | <i>14x</i>      | <b>18.7</b>       | 18.6           | 0.12                                   | yes                           | yes                         | yes        |     |
| <b>7</b>        | <i>0x</i>       | <b>33.1</b>       |                |                                        |                               |                             |            |     |
|                 | <i>10x</i>      | <b>23.3</b>       | 23.1           | 0.25                                   | yes                           | yes                         | yes        |     |
|                 | <i>14x</i>      | <b>19.7</b>       | 19.1           | 0.57                                   | yes                           | yes                         | yes        |     |
| <b>8</b>        | <i>0x</i>       | <b>34.9</b>       |                |                                        |                               |                             |            |     |
|                 | <i>10x</i>      | <b>24.7</b>       | 24.9           | -0.25                                  | yes                           | yes                         | yes        |     |
|                 | <i>14x</i>      | <b>20.8</b>       | 20.9           | -0.15                                  | yes                           | yes                         | yes        |     |
| <b>9</b>        | <i>0x</i>       | <b>34.9</b>       |                |                                        |                               |                             |            |     |
|                 | <i>10x</i>      | <b>25.3</b>       | 24.9           | 0.43                                   | yes                           | yes                         | yes        |     |
|                 | <i>14x</i>      | <b>21.0</b>       | 20.9           | 0.11                                   | yes                           | yes                         | yes        |     |
| <b>10</b>       | <i>0x</i>       | <b>35.0</b>       |                |                                        |                               |                             |            |     |
|                 | <i>10x</i>      | <b>25.2</b>       | 25.0           | 0.14                                   | yes                           | yes                         | yes        |     |
|                 | <i>14x</i>      | <b>21.3</b>       | 21.0           | 0.33                                   | yes                           | yes                         | yes        |     |
| <b>11</b>       | <i>0x</i>       | <b>n/a</b>        |                |                                        |                               |                             |            |     |
|                 | <i>10x</i>      | <b>34.2</b>       | n/a            | n/a                                    | no                            | no                          | yes        |     |
|                 | <i>14x</i>      | <b>27.6</b>       | n/a            | n/a                                    | no                            | no                          | yes        |     |
| <b>12</b>       | <i>0x</i>       | <b>n/a</b>        |                |                                        |                               |                             |            |     |
|                 | <i>10x</i>      | <b>32.6</b>       | n/a            | n/a                                    | no                            | no                          | yes        |     |
|                 | <i>14x</i>      | <b>27.3</b>       | n/a            | n/a                                    | no                            | no                          | yes        |     |

|               |             |            |             |      |      |     |     |     |
|---------------|-------------|------------|-------------|------|------|-----|-----|-----|
| <b>CDKN1A</b> | <b>mean</b> | <i>0x</i>  | <b>33.1</b> |      |      |     |     |     |
|               |             | <i>10x</i> | <b>23.2</b> | 23.1 | 0.09 | yes | yes | yes |
|               |             | <i>14x</i> | <b>19.3</b> | 19.1 | 0.24 |     |     |     |

| Gene        | Sample ID | Pre-amplification | Measurements   |          |                                 | Interpretation                |                      |            |
|-------------|-----------|-------------------|----------------|----------|---------------------------------|-------------------------------|----------------------|------------|
|             |           |                   | Mean Ct values |          | Difference observed vs expected | Manufacturer predicts success | Our findings: works? | Agreement? |
|             |           |                   | observed       | expected |                                 |                               |                      |            |
| <b>DDB2</b> | <b>1</b>  | <i>0x</i>         | 35.8           |          |                                 |                               |                      |            |
|             |           | <i>10x</i>        | 26.7           | 25.8     | 0.97                            | no                            | no                   | yes        |
|             |           | <i>14x</i>        | 22.9           | 21.8     | 1.17                            | no                            | no                   | yes        |
|             | <b>2</b>  | <i>0x</i>         | 36.1           |          |                                 |                               |                      |            |
|             |           | <i>10x</i>        | 26.3           | 26.1     | 0.20                            | no                            | yes                  | no         |
|             |           | <i>14x</i>        | 22.6           | 22.1     | 0.52                            | no                            | yes                  | no         |
|             | <b>3</b>  | <i>0x</i>         | 36.5           |          |                                 |                               |                      |            |
|             |           | <i>10x</i>        | 27.7           | 26.5     | 1.20                            | no                            | no                   | yes        |
|             |           | <i>14x</i>        | 24.1           | 22.5     | 1.57                            | no                            | no                   | yes        |
|             | <b>4</b>  | <i>0x</i>         | 36.3           |          |                                 |                               |                      |            |
|             |           | <i>10x</i>        | 26.4           | 26.3     | 0.17                            | no                            | yes                  | no         |
|             |           | <i>14x</i>        | 22.5           | 22.3     | 0.29                            | no                            | yes                  | no         |
|             | <b>5</b>  | <i>0x</i>         | n/a            |          |                                 |                               |                      |            |
|             |           | <i>10x</i>        | 30.5           | n/a      | n/a                             | no                            | no                   | yes        |
|             |           | <i>14x</i>        | 25.4           | n/a      | n/a                             | no                            | no                   | yes        |
|             | <b>6</b>  | <i>0x</i>         | n/a            |          |                                 |                               |                      |            |
|             |           | <i>10x</i>        | 27.5           | n/a      | n/a                             | no                            | no                   | yes        |
|             |           | <i>14x</i>        | 23.6           | n/a      | n/a                             | no                            | no                   | yes        |
|             | <b>7</b>  | <i>0x</i>         | n/a            |          |                                 |                               |                      |            |
|             |           | <i>10x</i>        | 27.9           | n/a      | n/a                             | no                            | no                   | yes        |
|             |           | <i>14x</i>        | 23.9           | n/a      | n/a                             | no                            | no                   | yes        |
|             | <b>8</b>  | <i>0x</i>         | 36.1           |          |                                 |                               |                      |            |
|             |           | <i>10x</i>        | 29.0           | 26.1     | 2.97                            | no                            | no                   | yes        |
|             |           | <i>14x</i>        | 24.1           | 22.1     | 1.98                            | no                            | no                   | yes        |
|             | <b>9</b>  | <i>0x</i>         | n/a            |          |                                 |                               |                      |            |
|             |           | <i>10x</i>        | n/a            | n/a      | n/a                             | no                            | no                   | yes        |
|             |           | <i>14x</i>        | 28.2           | n/a      | n/a                             | no                            | no                   | yes        |
|             | <b>10</b> | <i>0x</i>         | n/a            |          |                                 |                               |                      |            |
|             |           | <i>10x</i>        | 29.4           | n/a      | n/a                             | no                            | no                   | yes        |
|             |           | <i>14x</i>        | 25.8           | n/a      | n/a                             | no                            | no                   | yes        |
|             | <b>11</b> | <i>0x</i>         | n/a            |          |                                 |                               |                      |            |
|             |           | <i>10x</i>        | n/a            | n/a      | n/a                             | no                            | no                   | yes        |
|             |           | <i>14x</i>        | n/a            | n/a      | n/a                             | no                            | no                   | yes        |
|             | <b>12</b> | <i>0x</i>         | n/a            |          |                                 |                               |                      |            |
|             |           | <i>10x</i>        | n/a            | n/a      | n/a                             | no                            | no                   | yes        |
|             |           | <i>14x</i>        | n/a            | n/a      | n/a                             | no                            | no                   | yes        |

|             |             |            |      |      |      |    |    |     |
|-------------|-------------|------------|------|------|------|----|----|-----|
| <b>DDB2</b> | <i>mean</i> | <i>0x</i>  | 36.1 |      |      |    |    |     |
|             |             | <i>10x</i> | 27.9 | 26.1 | 1.8  | no | no | yes |
|             |             | <i>14x</i> | 24.5 | 22.1 | 2.33 |    |    |     |

| Genes | Sample ID | Pre-amplification | Measurements                      |                 |                                        | Interpretation                |                      |            |
|-------|-----------|-------------------|-----------------------------------|-----------------|----------------------------------------|-------------------------------|----------------------|------------|
|       |           |                   | Mean Ct values<br><i>observed</i> | <i>expected</i> | <i>Difference observed vs expected</i> | Manufacturer predicts success | Our findings: works? | Agreement? |
| FDXR  | 1         | 0x                | n/a                               |                 |                                        |                               |                      |            |
|       |           | 10x               | 27.6                              | n/a             | n/a                                    |                               |                      |            |
|       |           | 14x               | 23.0                              | 23.6            | -0.60                                  | no                            | yes                  | no         |
|       | 2         | 0x                | 36.7                              |                 |                                        |                               |                      |            |
|       |           | 10x               | 26.4                              | 26.7            | -0.26                                  | no                            | yes                  | no         |
|       |           | 14x               | 22.3                              | 22.7            | -0.35                                  | no                            | yes                  | no         |
|       | 3         | 0x                | n/a                               |                 |                                        |                               |                      |            |
|       |           | 10x               | 28.7                              | n/a             | n/a                                    |                               |                      |            |
|       |           | 14x               | 23.9                              | 24.7            | -0.72                                  | no                            | yes                  | no         |
|       | 4         | 0x                | 37.7                              |                 |                                        |                               |                      |            |
|       |           | 10x               | 27.2                              | 27.7            | -0.47                                  | no                            | yes                  | no         |
|       |           | 14x               | 22.7                              | 23.7            | -0.96                                  | no                            | yes                  | no         |
| 5     | 0x        | n/a               |                                   |                 |                                        |                               |                      |            |
|       | 10x       | 30.5              | n/a                               | n/a             |                                        |                               |                      |            |
|       | 14x       | 26.1              | 26.5                              | -0.40           | no                                     | yes                           | no                   |            |
| 6     | 0x        | 37.6              |                                   |                 |                                        |                               |                      |            |
|       | 10x       | 30.0              | 27.6                              | 2.32            | no                                     | no                            | yes                  |            |
|       | 14x       | 24.4              | 23.6                              | 0.73            | no                                     | yes                           | no                   |            |
| 7     | 0x        | n/a               |                                   |                 |                                        |                               |                      |            |
|       | 10x       | 28.6              | n/a                               | n/a             |                                        |                               |                      |            |
|       | 14x       | 24.6              | 24.6                              | 0.06            | no                                     | yes                           | no                   |            |
| 8     | 0x        | n/a               |                                   |                 |                                        |                               |                      |            |
|       | 10x       | 30.3              | n/a                               | n/a             |                                        |                               |                      |            |
|       | 14x       | 25.9              | 26.3                              | -0.36           | no                                     | yes                           | no                   |            |
| 9     | 0x        | n/a               |                                   |                 |                                        |                               |                      |            |
|       | 10x       | 30.1              | n/a                               | n/a             |                                        |                               |                      |            |
|       | 14x       | 25.5              | 26.1                              | -0.58           | no                                     | yes                           | no                   |            |
| 10    | 0x        | n/a               |                                   |                 |                                        |                               |                      |            |
|       | 10x       | 28.9              | n/a                               | n/a             |                                        |                               |                      |            |
|       | 14x       | 25.2              | 24.9                              | 0.31            | no                                     | yes                           | no                   |            |
| 11    | 0x        | n/a               |                                   |                 |                                        |                               |                      |            |
|       | 10x       | n/a               | n/a                               | n/a             | no                                     | no                            | yes                  |            |
|       | 14x       | n/a               | n/a                               | n/a             | no                                     | no                            | yes                  |            |
| 12    | 0x        | n/a               |                                   |                 |                                        |                               |                      |            |
|       | 10x       | 31.0              | n/a                               | n/a             | no                                     | no                            | yes                  |            |
|       | 14x       | n/a               | 27.0                              | n/a             | no                                     | no                            | yes                  |            |

|      |      |     |      |      |      |    |     |    |
|------|------|-----|------|------|------|----|-----|----|
| FDXR | mean | 0x  | 37.4 |      |      |    |     |    |
|      |      | 10x | 28.4 | 27.4 | 1.02 | no | yes | no |
|      |      | 14x | 23.9 | 23.4 | 0.49 |    |     |    |

| Genes Sample ID Pre-amplification |            |            | Measurements                               |                                                    |                                     | Interpretation                    |            |    |
|-----------------------------------|------------|------------|--------------------------------------------|----------------------------------------------------|-------------------------------------|-----------------------------------|------------|----|
|                                   |            |            | Mean Ct values<br><i>observed expected</i> | <i>Difference<br/>observed<br/>vs<br/>expected</i> | Manufacturer<br>predicts<br>success | <u>Our</u><br>findings:<br>works? | Agreement? |    |
| <b>GAPDH</b>                      | <b>1</b>   | <i>0x</i>  | 31.4                                       |                                                    |                                     |                                   |            |    |
|                                   |            | <i>10x</i> | 26.3                                       | 21.4                                               | 4.92                                | yes                               | no         | no |
|                                   |            | <i>14x</i> | 23.4                                       | 17.4                                               | 6.05                                | yes                               | no         | no |
|                                   | <b>2</b>   | <i>0x</i>  | 31.2                                       |                                                    |                                     |                                   |            |    |
|                                   |            | <i>10x</i> | 25.7                                       | 21.2                                               | 4.50                                | yes                               | no         | no |
|                                   |            | <i>14x</i> | 22.6                                       | 17.2                                               | 5.34                                | yes                               | no         | no |
|                                   | <b>3</b>   | <i>0x</i>  | 31.9                                       |                                                    |                                     |                                   |            |    |
|                                   |            | <i>10x</i> | 27.6                                       | 21.9                                               | 5.72                                | yes                               | no         | no |
|                                   |            | <i>14x</i> | 24.7                                       | 17.9                                               | 6.78                                | yes                               | no         | no |
|                                   | <b>4</b>   | <i>0x</i>  | 31.3                                       |                                                    |                                     |                                   |            |    |
|                                   |            | <i>10x</i> | 27.0                                       | 21.3                                               | 5.70                                | yes                               | no         | no |
|                                   |            | <i>14x</i> | 23.9                                       | 17.3                                               | 6.55                                | yes                               | no         | no |
| <b>5</b>                          | <i>0x</i>  | 35.4       |                                            |                                                    |                                     |                                   |            |    |
|                                   | <i>10x</i> | 30.8       | 25.4                                       | 5.41                                               | no                                  | no                                | yes        |    |
|                                   | <i>14x</i> | 27.5       | 21.4                                       | 6.03                                               | no                                  | no                                | yes        |    |
| <b>6</b>                          | <i>0x</i>  | 32.7       |                                            |                                                    |                                     |                                   |            |    |
|                                   | <i>10x</i> | 28.4       | 22.7                                       | 5.73                                               | yes                                 | no                                | no         |    |
|                                   | <i>14x</i> | 25.4       | 18.7                                       | 6.69                                               | yes                                 | no                                | no         |    |
| <b>7</b>                          | <i>0x</i>  | 38.1       |                                            |                                                    |                                     |                                   |            |    |
|                                   | <i>10x</i> | 37.3       | 28.1                                       | 9.20                                               | no                                  | no                                | yes        |    |
|                                   | <i>14x</i> | 34.5       | 24.1                                       | 10.43                                              | no                                  | no                                | yes        |    |
| <b>8</b>                          | <i>0x</i>  | 33.3       |                                            |                                                    |                                     |                                   |            |    |
|                                   | <i>10x</i> | 28.6       | 23.3                                       | 5.35                                               | yes                                 | no                                | no         |    |
|                                   | <i>14x</i> | 25.3       | 19.3                                       | 5.98                                               | yes                                 | no                                | no         |    |
| <b>9</b>                          | <i>0x</i>  | 35.3       |                                            |                                                    |                                     |                                   |            |    |
|                                   | <i>10x</i> | 30.9       | 25.3                                       | 5.53                                               | no                                  | no                                | yes        |    |
|                                   | <i>14x</i> | 27.7       | 21.3                                       | 6.42                                               | no                                  | no                                | yes        |    |
| <b>10</b>                         | <i>0x</i>  | 34.6       |                                            |                                                    |                                     |                                   |            |    |
|                                   | <i>10x</i> | 30.3       | 24.6                                       | 5.71                                               | yes                                 | no                                | no         |    |
|                                   | <i>14x</i> | 27.2       | 20.6                                       | 6.62                                               | yes                                 | no                                | no         |    |
| <b>11</b>                         | <i>0x</i>  | n/a        |                                            |                                                    |                                     |                                   |            |    |
|                                   | <i>10x</i> | n/a        | n/a                                        | n/a                                                | no                                  | no                                | yes        |    |
|                                   | <i>14x</i> | n/a        | n/a                                        | n/a                                                | no                                  | no                                | yes        |    |
| <b>12</b>                         | <i>0x</i>  | n/a        |                                            |                                                    |                                     |                                   |            |    |
|                                   | <i>10x</i> | n/a        | n/a                                        | n/a                                                | no                                  | no                                | yes        |    |
|                                   | <i>14x</i> | 35.8       | n/a                                        | n/a                                                | no                                  | no                                | yes        |    |

|              |             |            |      |      |      |     |    |    |
|--------------|-------------|------------|------|------|------|-----|----|----|
| <b>GAPDH</b> | <b>mean</b> | <i>0x</i>  | 33.5 |      |      |     |    |    |
|              |             | <i>10x</i> | 29.3 | 23.5 | 5.78 | yes | no | no |
|              |             | <i>14x</i> | 26.2 | 19.5 | 6.69 |     |    |    |

## Supplemental table 1

The table depicts qRT-PCR results (single raw threshold cycle [Ct]-values, duplicate measurements not shown) of four gene targets (*CDKN1A*, *FDXR*, *DDB2* and *GAPDH*) for all saliva samples. Shown are the measured/observed mean Ct values for unamplified samples as well as for samples after 10X and 14X pre-amplification. The column for expected mean Ct values shows the calculated Ct values when estimating a 100% linear and unbiased 10X and 14X pre-amplification (steps by 10 and 14, taking the mean Ct value without pre-amplification). The  $\Delta Ct$  (observed vs expected) is shown for each gene and each pre-amplification. We categorized the data by whether unbiased pre-amplification should have worked according to the manufacturer (Ct value without pre-amplification <35, yes) or not (Ct value without pre-amplification >35, no). For *FDXR* the interpretation whether we could show linear pre-amplification, when no Ct value was available without pre-amplification, was done according to the steps between 10X and 14X pre-amplification. The data are further presented if pre-amplification worked linear (yes) or not (no) according to the amplification biases through deviating expression patterns between amplified and un-amplified material.
